# Supplementary material
Source: PubMed Central journal article supplement (PMC4586313)
Supplement: NIHMS690908-supplement-supplement_1.pdf [file NIHMS690908-supplement-supplement_1.pdf]

**Supplementary Table I. Current Procedure Terminology codes for inclusion into cohort.**

| Procedure                              | CPT codes                                                                                                                                                |
|----------------------------------------|----------------------------------------------------------------------------------------------------------------------------------------------------------|
| Open Abdominal Aortic Aneurysm repair  | 35081, 35082, 35091, 35092, 35102, 35103, 34830, 34831, 34832                                                                                            |
| Open Aortoiliac repair                 | 35331, 35351, 35355, 35361, 35521, 35533, 35537, 35538, 35539, 35540, 35563, 35565, 35621, 35623, 35637, 35638, 35646, 35647, 35654, 35661, 35663, 35665 |
| Open Lower Extremity Revascularization | 35556, 35566, 35571, 35583, 35585, 35587, 35656, 35666, 35671                                                                                            |

---

**Supplementary Table II. Assessment of factors associated with post-discharge**
**SSI occurring with 30-days after major vascular surgery.**

| Characteristic       | Post-discharge<br>SSI<br>n=3,411<br>(6.9%) | No SSI after<br>discharge<br>n=46,406<br>(93%) | P-value |
|----------------------|--------------------------------------------|------------------------------------------------|---------|
| <i>Demographics</i>  |                                            |                                                |         |
| Female gender        | 43%                                        | 35%                                            | <.0001  |
| Age                  |                                            |                                                |         |
| < 65                 | 45%                                        | 39%                                            | <.0001  |
| ≥ 65                 | 55%                                        | 61%                                            |         |
| Race:                |                                            |                                                |         |
| White                | 79%                                        | 78%                                            | .1027   |
| Black                | 13%                                        | 13%                                            |         |
| Other                | 8.7%                                       | 9.9%                                           |         |
| <i>Comorbidities</i> |                                            |                                                |         |
| BMI                  |                                            |                                                |         |
| Normal               | 24%                                        | 34%                                            | <.0001  |
| Overweight           | 31%                                        | 35%                                            |         |
| Obese                | 43%                                        | 26%                                            |         |
| Underweight          | 2.4%                                       | 4.1%                                           |         |
| Diabetes             |                                            |                                                |         |
| Insulin              | 26%                                        | 16%                                            | <.0001  |

---

|                                          |      |      |        |
|------------------------------------------|------|------|--------|
| Non-insulin (PO)                         | 19%  | 16%  |        |
| No Diabetes                              | 54%  | 68%  |        |
| Smoker                                   | 49%  | 46%  | .0077  |
| Hypertension                             | 86%  | 82%  | <.0001 |
| Coronary Artery Disease                  | 33%  | 28%  | <.0001 |
| Critical Limb Ischemia <sup>a</sup>      | 45%  | 34%  | <.0001 |
| Peripheral Vascular Disease <sup>a</sup> | 52%  | 42%  | <.0001 |
| Congestive Heart Failure                 | 2.6% | 2.1% | .0990  |
| Dyspnea                                  |      |      |        |
| None                                     | 79%  | 82%  | <.0001 |
| With Moderate Exertion                   | 19%  | 16%  |        |
| At Rest                                  | 2.0% | 1.7% |        |
| Functionally status                      |      |      |        |
| Independent                              | 87%  | 89%  | <.0001 |
| Partially dependent                      | 12%  | 9.9% |        |
| Totally dependent                        | 0.7% | 1.5% |        |
| COPD                                     | 17%  | 15%  | .0349  |
| Dialysis                                 | 5.8% | 4.3% | <.0001 |
| Neurological Disease                     | 17%  | 15%  | <.0001 |
| Open or infected wound                   | 30%  | 23%  | <.0001 |
| Chronic steroid use                      | 4.1% | 3.5% | .0740  |
| Bleeding disorder                        | 24%  | 20%  | <.0001 |
| Disseminated Cancer                      | 0.3% | 0.5% | .0848  |

|                                        |       |       |        |
|----------------------------------------|-------|-------|--------|
| Loss of weight                         | 0.9%  | 1.7%  | .0005  |
| Alcohol abuse <sup>a</sup>             | 5.9%  | 6.1%  | .6148  |
| <i>Perioperative Characteristics</i>   |       |       |        |
| Ventilator 48 hours before surgery     | 0.2%  | 0.5%  | .0193  |
| Emergency Case                         | 6.3%  | 7.7%  | .0023  |
| Transfusion in 72 hours before surgery | 0.9%  | 1.4%  | .0326  |
| Operation time                         |       |       |        |
| <4 hours                               | 56%   | 63%   | <.0001 |
| 4-6 hours                              | 32%   | 27%   |        |
| >6 hours                               | 13%   | 10%   |        |
| ASA class:                             |       |       |        |
| I or II                                | 5.3%  | 6.4%  | .0275  |
| III                                    | 71%   | 70%   |        |
| IV or V                                | 24%   | 23%   |        |
| Groin anastomosis                      |       |       |        |
| Graft                                  |       |       |        |
| None                                   | 3.7%  | 3.6%  | <.0001 |
| Vein                                   | 51.4% | 38.6% |        |
| Other than vein                        | 44.9% | 57.9% |        |
| Wound Class                            |       |       |        |
| Clean                                  | 93%   | 92%   | .3888  |

|                                 |       |      |        |
|---------------------------------|-------|------|--------|
| Clean/Contaminated              | 2.4%  | 2.8% |        |
| Contaminated                    | 2.6%  | 2.4% |        |
| Dirty                           | 2.4%  | 2.4% |        |
| <i>Complications</i>            |       |      |        |
| Infectious                      | 2.2 % | 4.5% | <.0001 |
| Respiratory                     | 2.1%  | 5.3% | <.0001 |
| Renal                           | 0.6%  | 2.0% | <.0001 |
| Central nervous system          | 0.1%  | 0.2% | .3540  |
| Cardiac                         | 1.8%  | 1.8% | .8766  |
| DVT/PE                          | 0.1%  | 0.3% | .0276  |
| Transfusion for Bleeding        | 15%   | 17%  | .0029  |
| Graft Loss                      | 0.0%  | 0.2% | .0383  |
| Sepsis                          | 1.4%  | 3.5% | <.0001 |
| <i>Adverse Outcomes</i>         |       |      |        |
| Reoperation within 30-days      | 39%   | 12%  | <.0001 |
| Prolonged LOS ( $\geq$ 14-days) | 4.2%  | 11%  | <.0001 |

<sup>a</sup>Variables with 21% missing values; respective percentages and  $\chi^2$  p-values reflect exclusion of the respective missing data.

*SSI*, Surgical site infection; *BMI*, Body Mass Index; *DNR*, Do Not Resuscitate;

*COPD*, Chronic Obstructive Pulmonary Disease; *ASA*, American Society of

Anesthesiologists; *AAA*, Abdominal Aortic Aneurysm; *LOS* Length of Stay;

*DVT/PE* thrombophlebitis, deep vein thrombosis, pulmonary embolism.

**Supplementary Table III. Significant results of multivariable regression analysis for predictors of 30-day in-hospital and post-discharge surgical site infection.**

| <i>Variables</i>     | <i>In-hospital</i> |               |          | <i>Post-discharge</i> |               |          |
|----------------------|--------------------|---------------|----------|-----------------------|---------------|----------|
|                      | <i>OR</i>          | <i>95% CI</i> | <i>P</i> | <i>OR</i>             | <i>95% CI</i> | <i>P</i> |
| <i>Demographics</i>  |                    |               |          |                       |               |          |
| Age $\geq$ 65        |                    |               |          | 0.9                   | (0.9, 1.0)    | .0426    |
| Female gender        | 1.3                | (1.2, 1.5)    | <.0001   | 1.4                   | (1.3, 1.5)    | <.0001   |
| Race:                |                    |               |          |                       |               |          |
| White                |                    |               |          | Ref                   |               |          |
| Black                | 1.0                | (0.8, 1.2)    | 0.8960   | 0.8                   | (0.7, 0.9)    | 0.0002   |
| Other                | 1.4                | (1.2, 1.7)    | 0.0005   | 0.9                   | (0.8, 1.0)    | 0.2041   |
| <i>Comorbidities</i> |                    |               |          |                       |               |          |
| BMI                  |                    |               |          |                       |               |          |
| Normal               | Ref                |               |          | Ref                   |               |          |
| Overweight           | 1.1                | (1.0, 1.3)    | 0.1158   | 1.3                   | (1.2, 1.5)    | <.0001   |
| Obese                | 1.7                | (1.5, 2.0)    | <.0001   | 2.3                   | (2.1, 2.5)    | <.0001   |
| Underweight          | 0.7                | (0.5, 1.0)    | 0.0660   | 0.8                   | (0.7, 1.1)    | 0.1323   |
| Diabetes             |                    |               |          |                       |               |          |
| No Diabetes          |                    |               |          | Ref                   |               |          |
| Non-insulin (PO)     |                    |               |          | 1.2                   | (1.1, 1.3)    | 0.0019   |
| Insulin              |                    |               |          | 1.3                   | (1.2, 1.4)    | <.0001   |
| Smoker               |                    |               |          | 1.2                   | (1.1, 1.3)    | <.0001   |

|                                      |     |            |        |     |            |        |
|--------------------------------------|-----|------------|--------|-----|------------|--------|
| Hypertension                         |     |            |        | 1.2 | (1.1, 1.4) | 0.0002 |
| Coronary Artery Disease              |     |            |        | 1.1 | (1.0, 1.2) | 0.0307 |
| Critical Limb Ischemia               | 1.2 | (1.0, 1.4) | 0.0315 | 1.2 | (1.1, 1.3) | <.0001 |
| Congestive heart failure             | 1.4 | (1.0, 1.9) | 0.0420 |     |            |        |
| Functionally status                  |     |            |        |     |            |        |
| Independent                          | Ref |            |        | Ref |            |        |
| Partially dependent                  | 1.3 | (1.1, 1.5) | 0.0063 | 1.1 | (1.0, 1.2) | 0.0856 |
| Totally dependent                    | 2.3 | (1.6, 3.2) | <.0001 | 0.5 | (0.4, 0.8) | 0.0066 |
| COPD                                 |     |            |        | 1.1 | (1.1, 1.2) | 0.0327 |
| Dyspnea                              |     |            |        |     |            |        |
| None                                 |     |            |        | Ref |            |        |
| Moderate exertion                    |     |            |        | 1.2 | (1.1, 1.3) | .0004  |
| At rest                              |     |            |        | 1.2 | (0.9, 1.6) | .1457  |
| Dialysis                             | 1.4 | (1.1, 1.8) | 0.0091 |     |            |        |
| Neurological Disease                 |     |            |        | 1.1 | (1.0, 1.3) | 0.0088 |
| Open or infected wound               | 1.3 | (1.1, 1.5) | 0.0030 |     |            |        |
| Chronic steroid use                  | 1.4 | (1.1, 1.9) | 0.0146 |     |            |        |
| <i>Perioperative Characteristics</i> |     |            |        |     |            |        |
| Ventilator 48 hours before surgery   | 0.5 | (0.3, 0.9) | 0.0141 |     |            |        |
| Emergency Case                       | 1.7 | (1.4, 2.0) | <.0001 |     |            |        |

|                                      |     |            |        |     |            |        |
|--------------------------------------|-----|------------|--------|-----|------------|--------|
| Operation time                       |     |            |        |     |            |        |
| <4 hours                             | Ref |            |        | Ref |            |        |
| 4-6 hours                            | 1.7 | (1.4, 1.9) | <.0001 | 1.4 | (1.3, 1.5) | <.0001 |
| >6 hours                             | 2.1 | (1.8, 2.6) | <.0001 | 1.5 | (1.4, 1.7) | <.0001 |
| Operative Procedure                  |     |            |        |     |            |        |
| AAA                                  | Ref |            |        | Ref |            |        |
| Aortoiliac                           | 1.2 | (1.0, 1.5) | 0.0337 | 2.8 | (1.9, 2.9) | <.0001 |
| Lower extremity<br>revascularization | 1.0 | (0.8, 1.3) | 0.9009 | 3.8 | (2.5, 3.8) | <.0001 |
| Groin anastomosis                    |     |            |        | 1.2 | (1.0, 1.4) | .0110  |
| ASA class                            |     |            |        |     |            |        |
| I or II                              | Ref |            |        | Ref |            |        |
| III                                  | 1.4 | (1.0, 1.9) | 0.0892 | 1.1 | (0.9, 1.3) | 0.4209 |
| IV or V                              | 1.6 | (1.1, 2.3) | 0.0149 | 1.2 | (1.0, 1.4) | 0.0411 |
| Wound Class                          |     |            |        |     |            |        |
| Clean                                | Ref |            |        |     |            |        |
| Clean/Contaminated                   | 1.8 | (1.3, 2.4) | <.0001 |     |            |        |
| Contaminated                         | 1.6 | (1.2, 2.2) | 0.0010 |     |            |        |
| Dirty                                | 1.0 | (0.7, 1.5) | 0.8008 |     |            |        |
| <i>Complications<sup>a</sup></i>     |     |            |        |     |            |        |
| Infectious                           | 0.7 | (0.5, 0.9) | 0.0046 |     |            |        |



|                                  |     |            |        |     |            |        |
|----------------------------------|-----|------------|--------|-----|------------|--------|
| Respiratory                      | 2.6 | (2.1, 3.2) | <.0001 |     |            |        |
| Renal                            |     |            |        | 0.6 | (0.4, 0.9) | 0.0270 |
| Transfusion for bleeding         | 1.3 | (1.1, 1.5) | 0.0008 |     |            |        |
| Graft Loss                       | 2.4 | (1.8, 3.1) | <.0001 |     |            |        |
| Sepsis                           | 3.7 | (3.0, 4.5) | <.0001 | 0.7 | (0.5, 0.9) | 0.0118 |
| <i>Other Adverse Outcomes</i>    |     |            |        |     |            |        |
| Prolonged LOS ( $\geq 14$ -days) | .   | .          | .      | 0.4 | (0.3, 0.5) | <.0001 |

In-hospital SSI logistic regression model additionally controlled for age, diabetes, smoking, chronic obstructive pulmonary disease, disseminated cancer and cardiac complications. Post-discharge logistic regression model additionally controlled for age, chronic steroid use, bleeding disorder, loss of weight, alcohol abuse, emergency case, cardiac complications and graft loss complications.

<sup>a</sup>Complications were coded to only count if they happened prior to the occurrence of an in-hospital SSI diagnosis in the in-hospital model.

*OR*, odds ratio; *CI*, confidence interval; *Ref*, Reference; *AAA*, Abdominal Aortic Aneurysm; *COPD*, Chronic Obstructive Pulmonary Disease; *AAA*, Abdominal Aortic Aneurysm; Length of Stay, *LOS*; Length of Stay; *ASA*, American Society of Anesthesiologists.
